# Supplementary figures and images for: Factors Associated With the Control of Viral Replication and Virologic Breakthrough in a Recently Infected HIV-1 Controller
Source: PubMed Central journal article supplement — eBioMedicine. 2017 Jan 26;16:141–9. doi: 10.1016/j.ebiom.2017.01.034 (PMC5474502; doi:10.1016/j.ebiom.2017.01.034), 2017-01-26

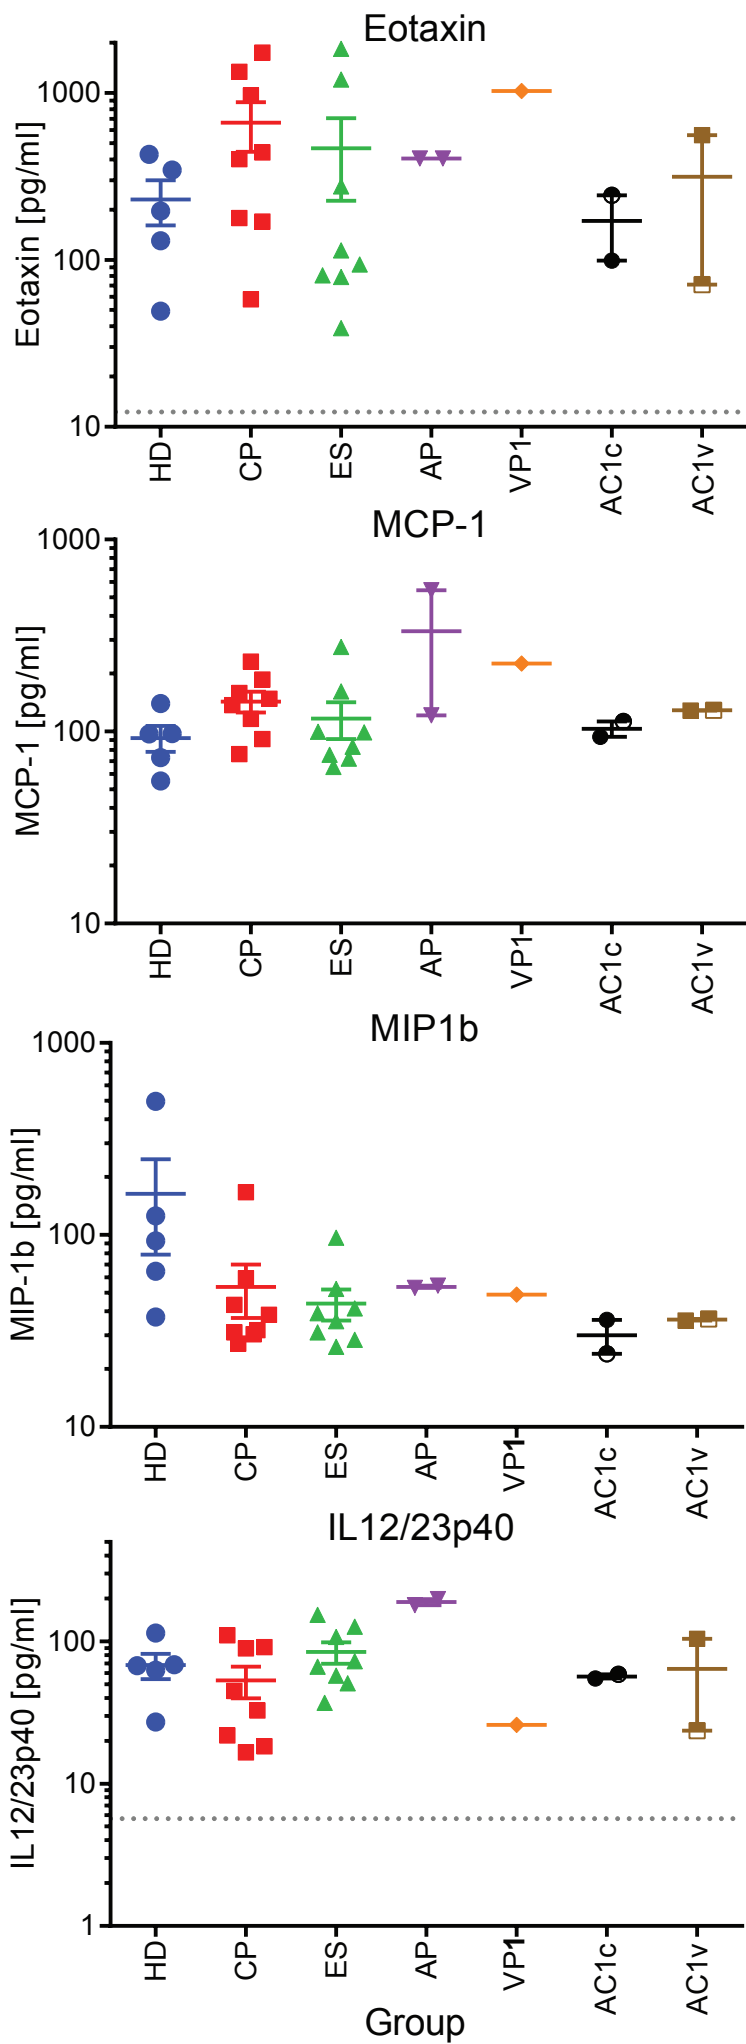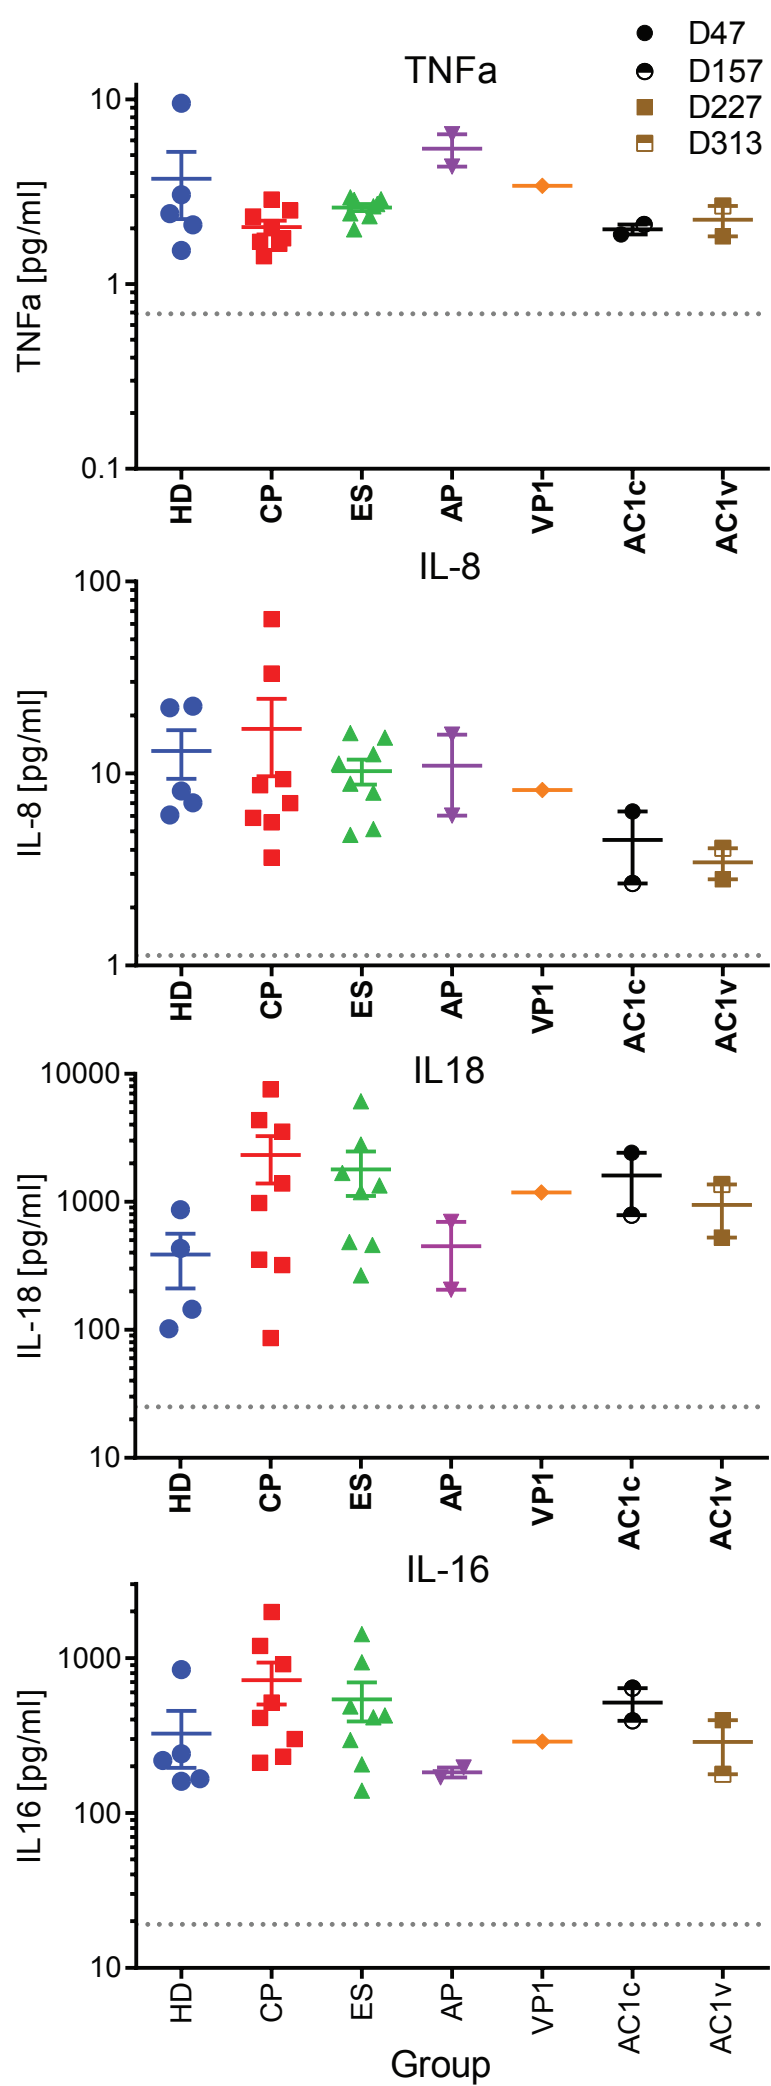

Supplement: mmc1.pdf [file mmc1.pdf]

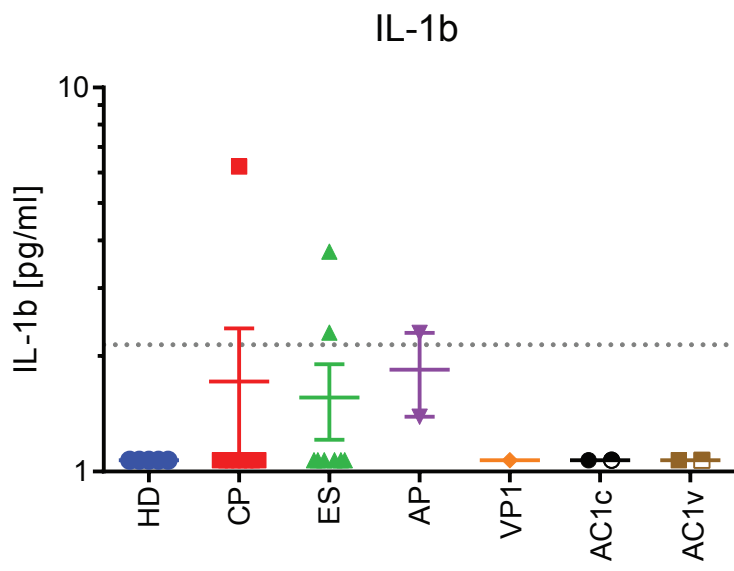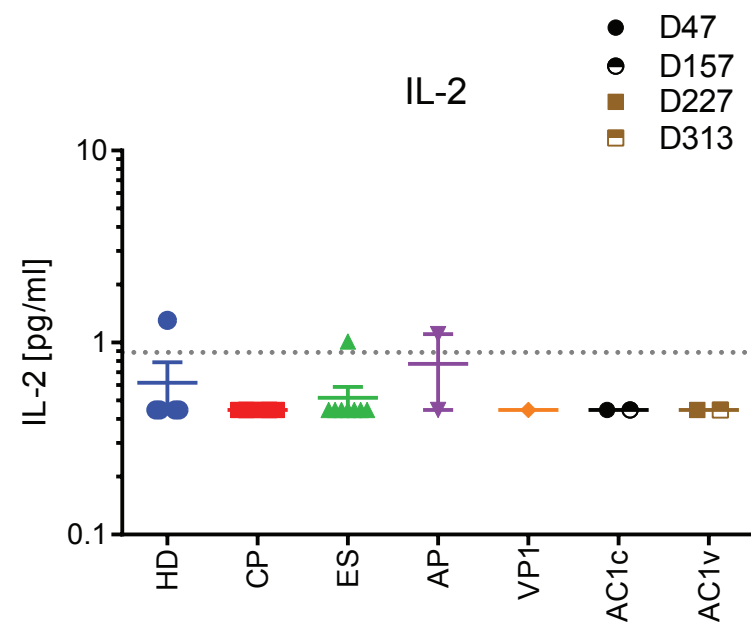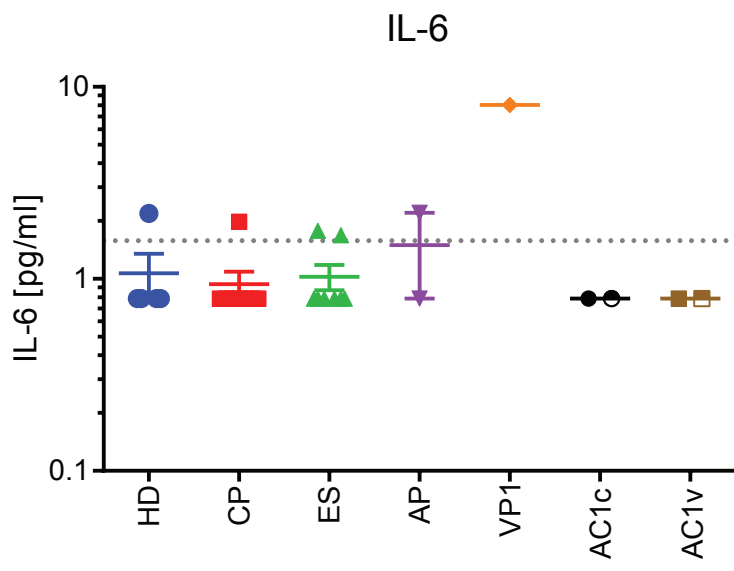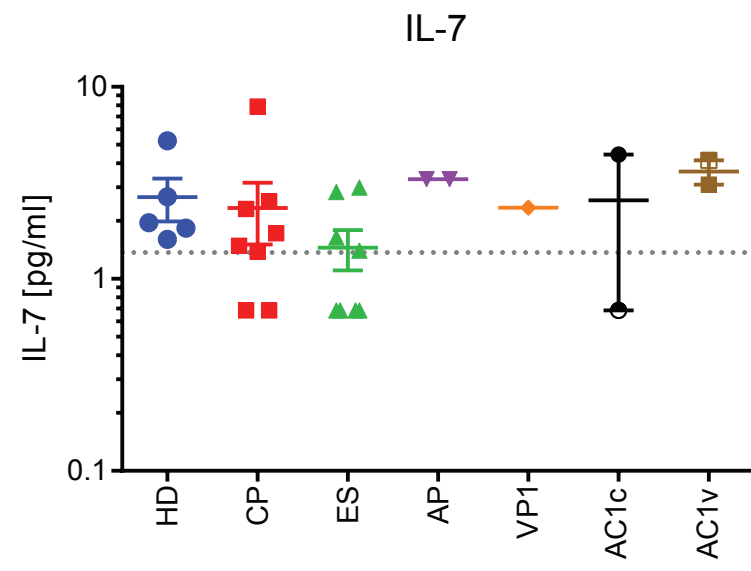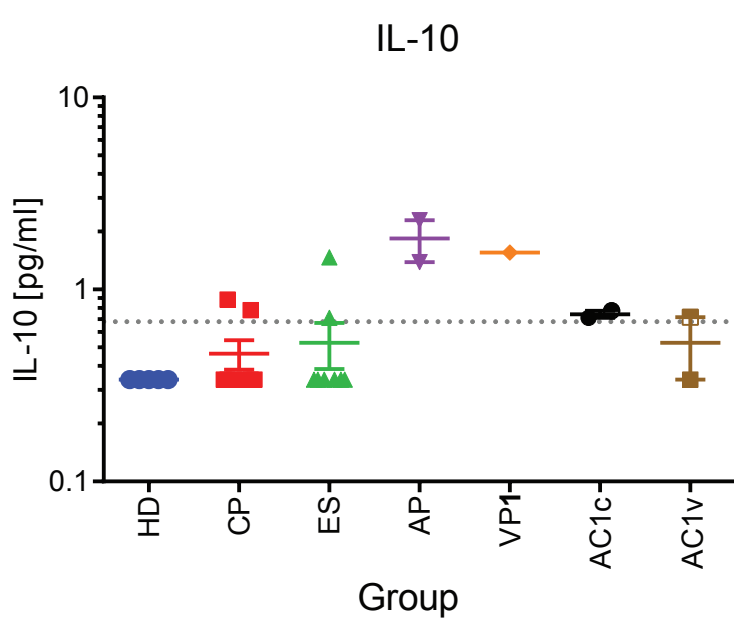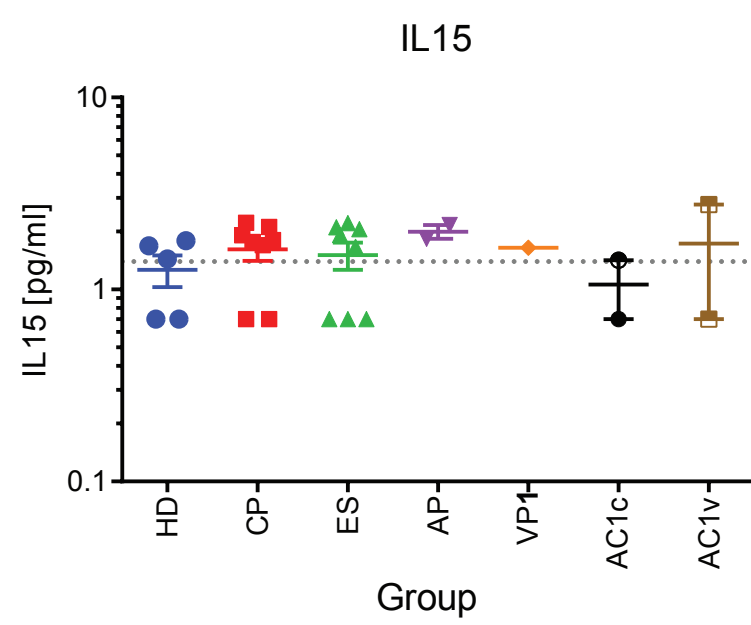

Supplement: mmc2.pdf [file mmc2.pdf]
